# Supplementary material
Source: PubMed Central journal article supplement (PMC1937571)

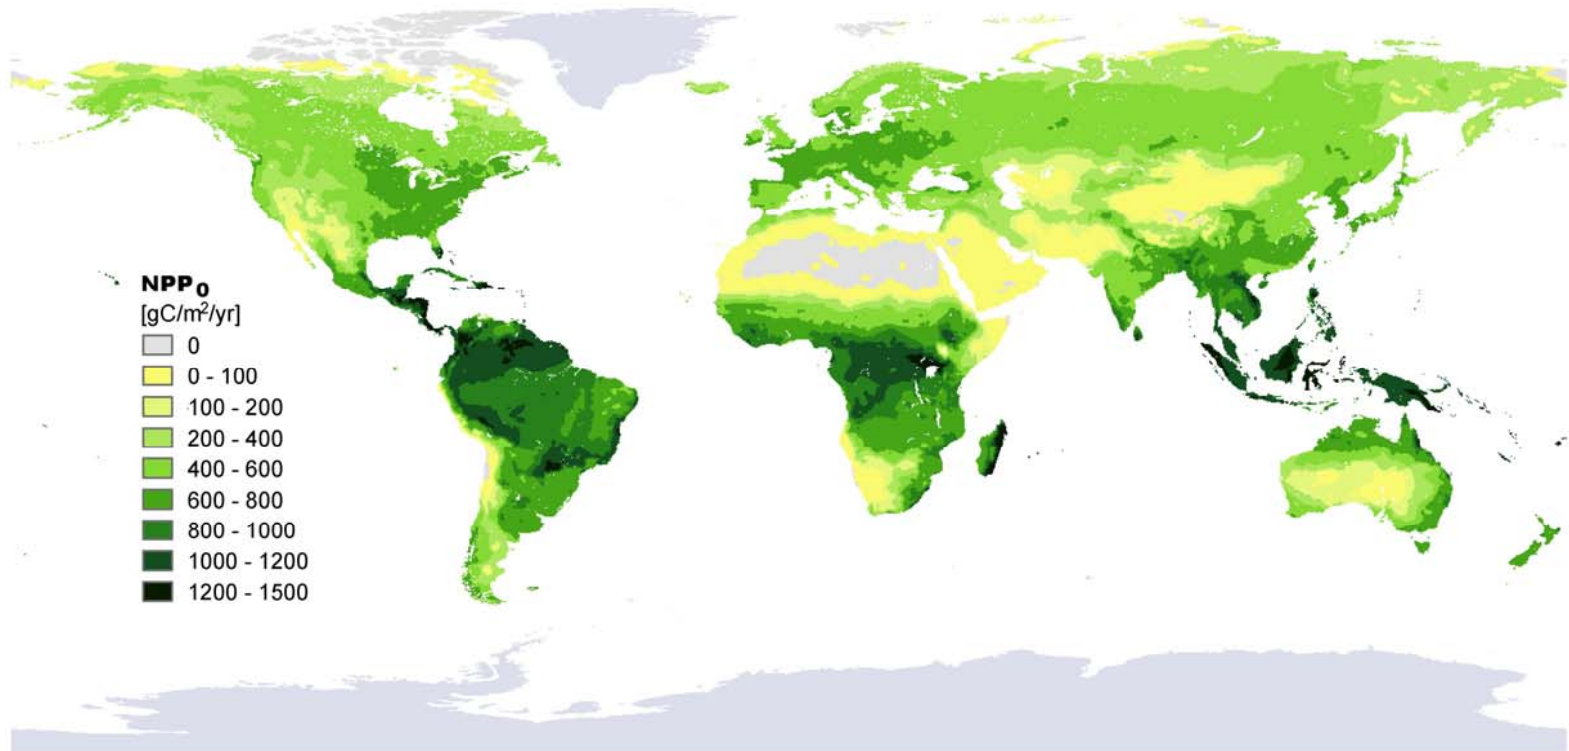

Supplement: pnas_0704243104_1.pdf [file pnas_0704243104_1.pdf]

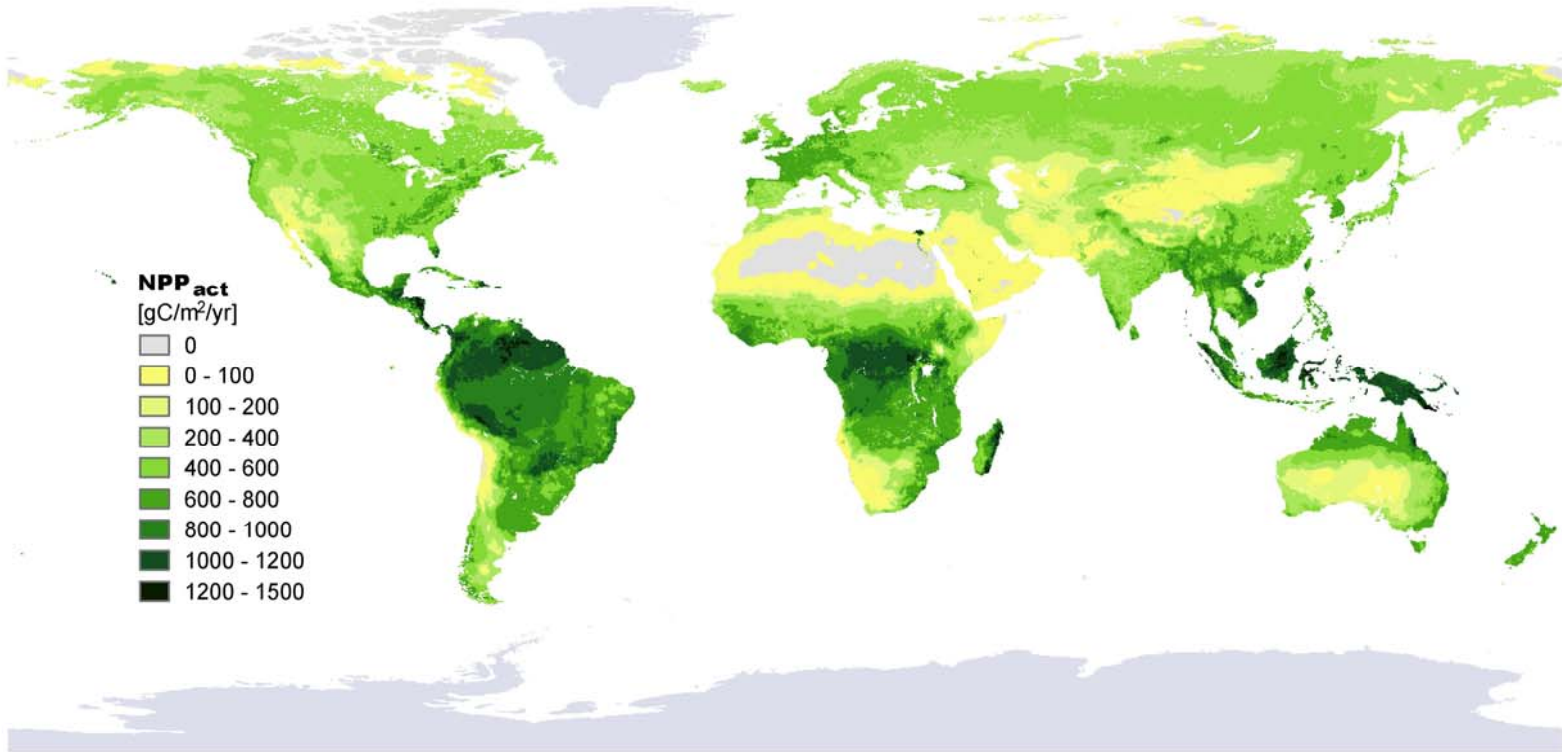

Supplement: pnas_0704243104_2.pdf [file pnas_0704243104_2.pdf]

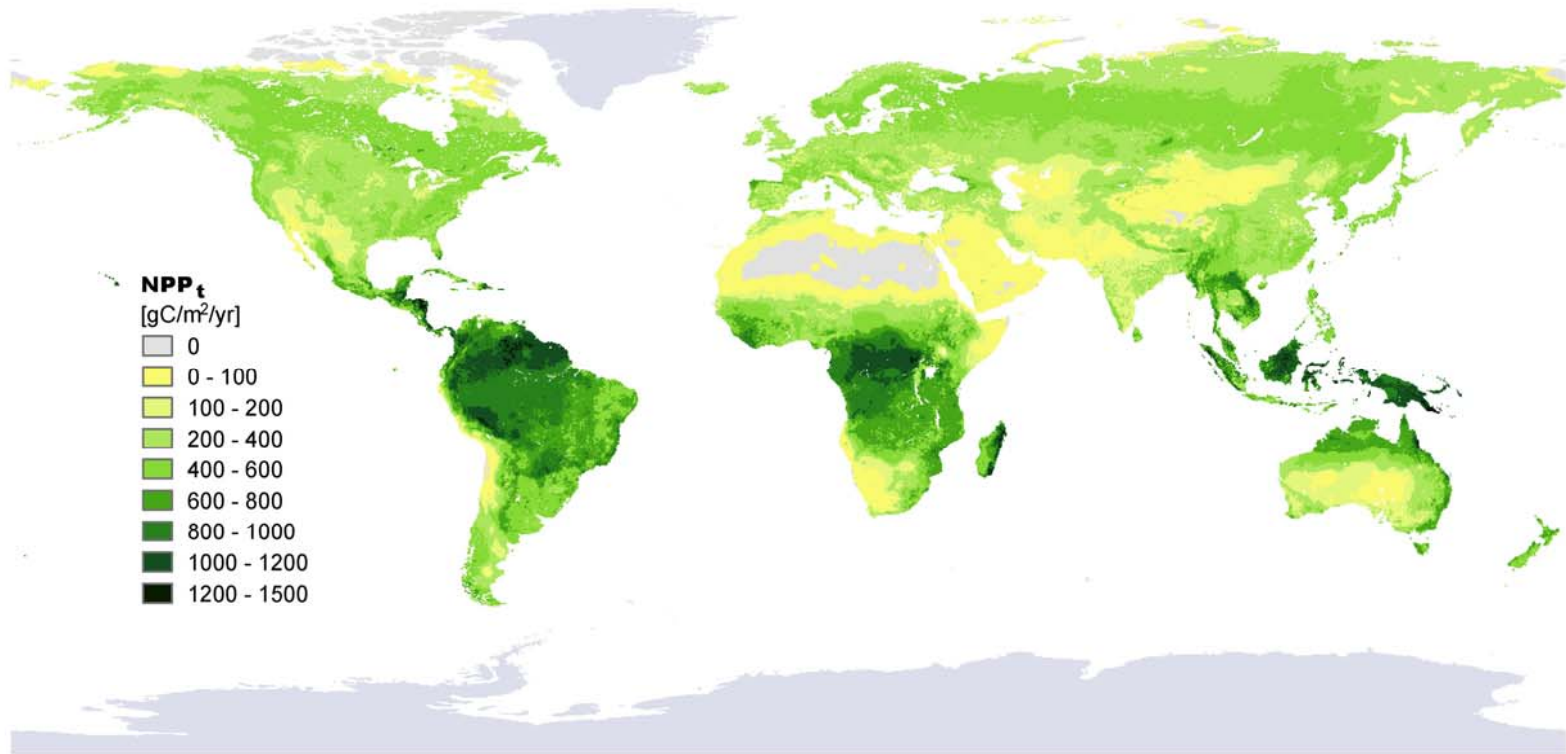

Supplement: pnas_0704243104_3.pdf [file pnas_0704243104_3.pdf]

## HANPP

[gC/m<sup>2</sup>/yr]

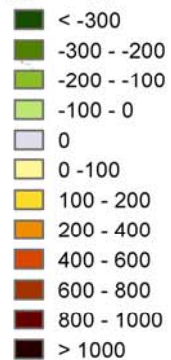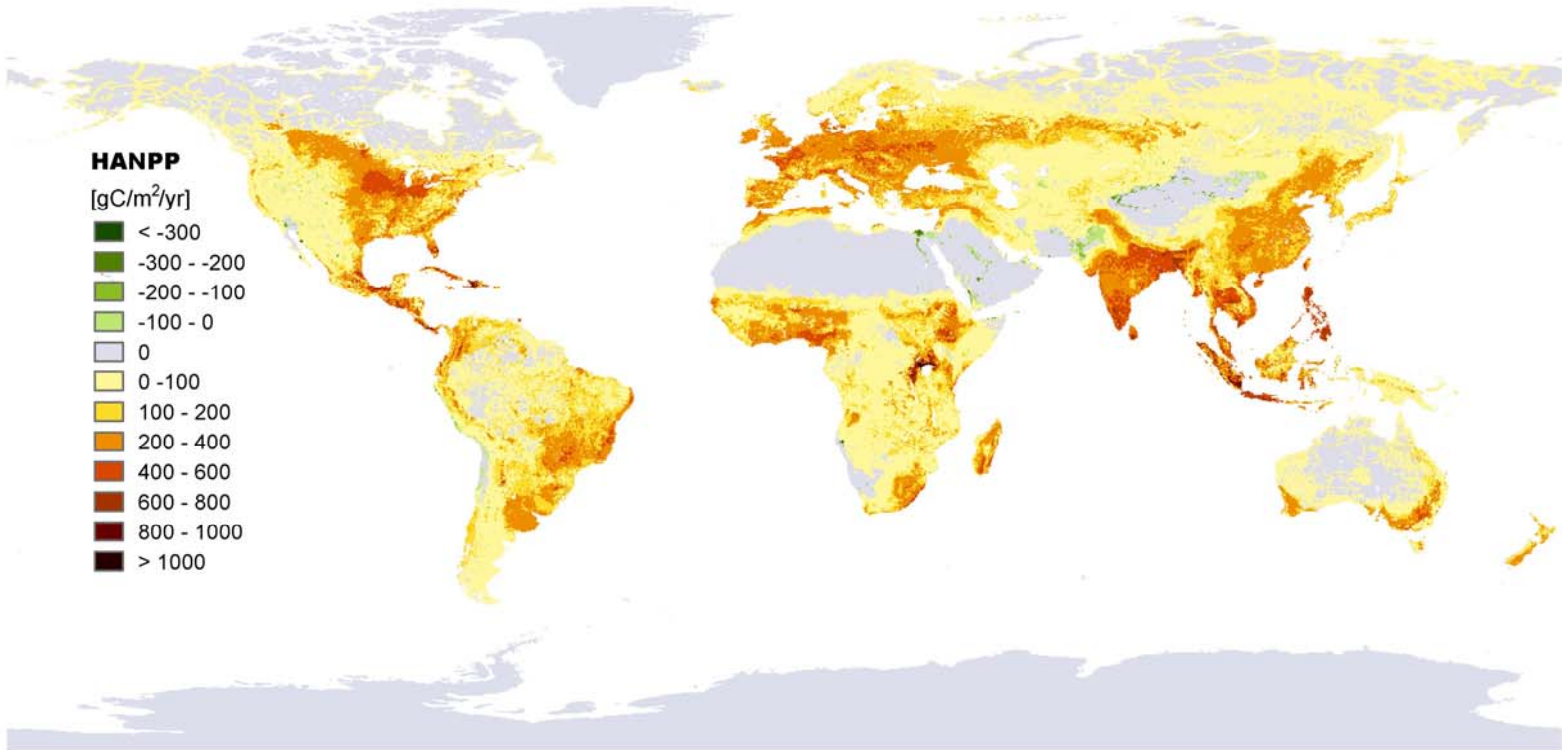

Supplement: pnas_0704243104_4.pdf [file pnas_0704243104_4.pdf]
